# Supplementary material for: Lactate-to-Albumin Ratio as an Independent Predictor of 28-Day ICU Mortality in Patients with Hypertension: A Retrospective Cohort Study
Source: Research Square preprint supplement (doi:10.21203/rs.3.rs-7001231/v1), 2025-07-22
Supplement: Supplementary file 1 [file be52e1d0d68cdd52f5fcbae0.docx]

**Supplementary Table 1:** ICD Code and Description.

| ICD Code | ICD Version | Description |
| --- | --- | --- |
| 4011 | 9 | Benign essential hypertension |
| I10 | 10 | Essential (primary) hypertension |
| I161 | 10 | Hypertensive emergency |
| 4010 | 9 | Malignant essential hypertension |
| 4019 | 9 | Unspecified essential hypertension |

**Supplementary Table 2:** Collinearity check.

| Variable | VIF |
| --- | --- |
| LAR | 1.327395 |
| Age | 1.479897 |
| Race | 1.071812 |
| Gender | 1.104667 |
| BMI | 1.180973 |
| Aki | 1.375552 |
| Ca | 1.062727 |
| Ckd | 1.038957 |
| T2dm | 1.10313 |
| Copd | 1.065982 |
| Mi | 1.036053 |
| Hf | 1.108799 |
| Antihypertensive | 1.082528 |
| Glucocorticoids | 1.111274 |
| Nbpm | 1.020272 |
| Rr | 1.131008 |
| Spo2 | 1.015898 |
| Temperaturef | 1.016244 |
| WBC | 1.069296 |
| RBC | 7.314101 |
| Hb | 7.183001 |
| Cr | 2.460052 |
| BUN | 2.478682 |
| Na | 1.161469 |
| K | 1.230345 |
| Calcium | 1.0922 |
| PLT | 1.235586 |
| Sofa | 2.704837 |
| Sapsii | 3.449242 |
| Gcs | 1.683148 |

**Supplementary Table 3:** Schoenfeld residual test

| Model | Variable | P |
| --- | --- | --- |
| Unadjusted Model | LAR | 0.001 |
| Unadjusted Model | GLOBAL | 0.001 |
|  |  |  |
| Model 1 | LAR | 0.002 |
| Model 1 | Age | 0.051 |
| Model 1 | Race | 0.679 |
| Model 1 | Gender | 0.884 |
| Model 1 | BMI | 0.945 |
| Model 1 | GLOBAL | 0.027 |
|  |  |  |
| Model 2 | LAR | 0.002 |
| Model 2 | Age | 0.047 |
| Model 2 | Race | 0.715 |
| Model 2 | Gender | 0.887 |
| Model 2 | BMI | 0.955 |
| Model 2 | Aki | 0.001 |
| Model 2 | Ca | 0.244 |
| Model 2 | Ckd | 0.216 |
| Model 2 | T2dm | 0.645 |
| Model 2 | Copd | 0.016 |
| Model 2 | Mi | 0.367 |
| Model 2 | Hf | 0.051 |
| Model 2 | GLOBAL | <0.001 |
|  |  |  |
| Model 3 | LAR | 0.006 |
| Model 3 | Age | 0.046 |
| Model 3 | Race | 0.75 |
| Model 3 | Gender | 0.842 |
| Model 3 | BMI | 0.992 |
| Model 3 | Aki | <0.001 |
| Model 3 | Ca | 0.266 |
| Model 3 | Ckd | 0.209 |
| Model 3 | T2dm | 0.617 |
| Model 3 | Copd | 0.017 |
| Model 3 | Mi | 0.353 |
| Model 3 | Hf | 0.059 |
| Model 3 | Antihypertensive | <0.001 |
| Model 3 | Glucocorticoids | <0.001 |
| Model 3 | Nbpm | 0.094 |
| Model 3 | Rr | 0.147 |
| Model 3 | Spo2 | 0.097 |
| Model 3 | Temperaturef | 0.361 |
| Model 3 | GLOBAL | <0.001 |
|  |  |  |
| Model 4 | LAR | 0.005 |
| Model 4 | Age | 0.054 |
| Model 4 | Race | 0.762 |
| Model 4 | Gender | 0.829 |
| Model 4 | BMI | 0.928 |
| Model 4 | Aki | <0.001 |
| Model 4 | Ca | 0.265 |
| Model 4 | Ckd | 0.205 |
| Model 4 | T2dm | 0.645 |
| Model 4 | Copd | 0.018 |
| Model 4 | Mi | 0.333 |
| Model 4 | Hf | 0.062 |
| Model 4 | Antihypertensive | <0.001 |
| Model 4 | Glucocorticoids | <0.001 |
| Model 4 | Nbpm | 0.094 |
| Model 4 | Rr | 0.139 |
| Model 4 | Spo2 | 0.097 |
| Model 4 | Temperaturef | 0.313 |
| Model 4 | WBC | 0.129 |
| Model 4 | RBC | 0.158 |
| Model 4 | Hb | 0.901 |
| Model 4 | Cr | 0.118 |
| Model 4 | BUN | 0.592 |
| Model 4 | Na | 0.045 |
| Model 4 | K | 0.82 |
| Model 4 | Calcium | 0.48 |
| Model 4 | PLT | 0.2 |
| Model 4 | GLOBAL | <0.001 |
|  |  |  |
| Model 5 | LAR | 0.006 |
| Model 5 | Age | 0.061 |
| Model 5 | Race | 0.784 |
| Model 5 | Gender | 0.878 |
| Model 5 | BMI | 0.859 |
| Model 5 | Aki | <0.001 |
| Model 5 | Ca | 0.299 |
| Model 5 | Ckd | 0.185 |
| Model 5 | T2dm | 0.638 |
| Model 5 | Copd | 0.015 |
| Model 5 | Mi | 0.352 |
| Model 5 | Hf | 0.063 |
| Model 5 | Antihypertensive | <0.001 |
| Model 5 | Glucocorticoids | <0.001 |
| Model 5 | Nbpm | 0.095 |
| Model 5 | Rr | 0.105 |
| Model 5 | Spo2 | 0.102 |
| Model 5 | Temperaturef | 0.308 |
| Model 5 | WBC | 0.129 |
| Model 5 | RBC | 0.209 |
| Model 5 | Hb | 0.991 |
| Model 5 | Cr | 0.149 |
| Model 5 | BUN | 0.756 |
| Model 5 | Na | 0.048 |
| Model 5 | K | 0.913 |
| Model 5 | Calcium | 0.536 |
| Model 5 | PLT | 0.196 |
| Model 5 | Sofa | 0.002 |
| Model 5 | Sapsii | 0.291 |
| Model 5 | Gcs | 0.913 |
| Model 5 | GLOBAL | <0.001 |
